# Supplementary material for: The Cardiac Stress Response Factor Ms1 Can Bind to DNA and Has a Function in the Nucleus
Source: PubMed Central journal article supplement (PMC4682817; doi:10.1371/journal.pone.0144614), 2015-12-14

# S1 Fig

Alignment of a selection of full length Ms1 protein sequences. A selection of functional features, structural domains and secondary structure elements are shown by bars. Experimentally identified phosphorylation sites that are conserved amongst mammals are indicated by red stars.

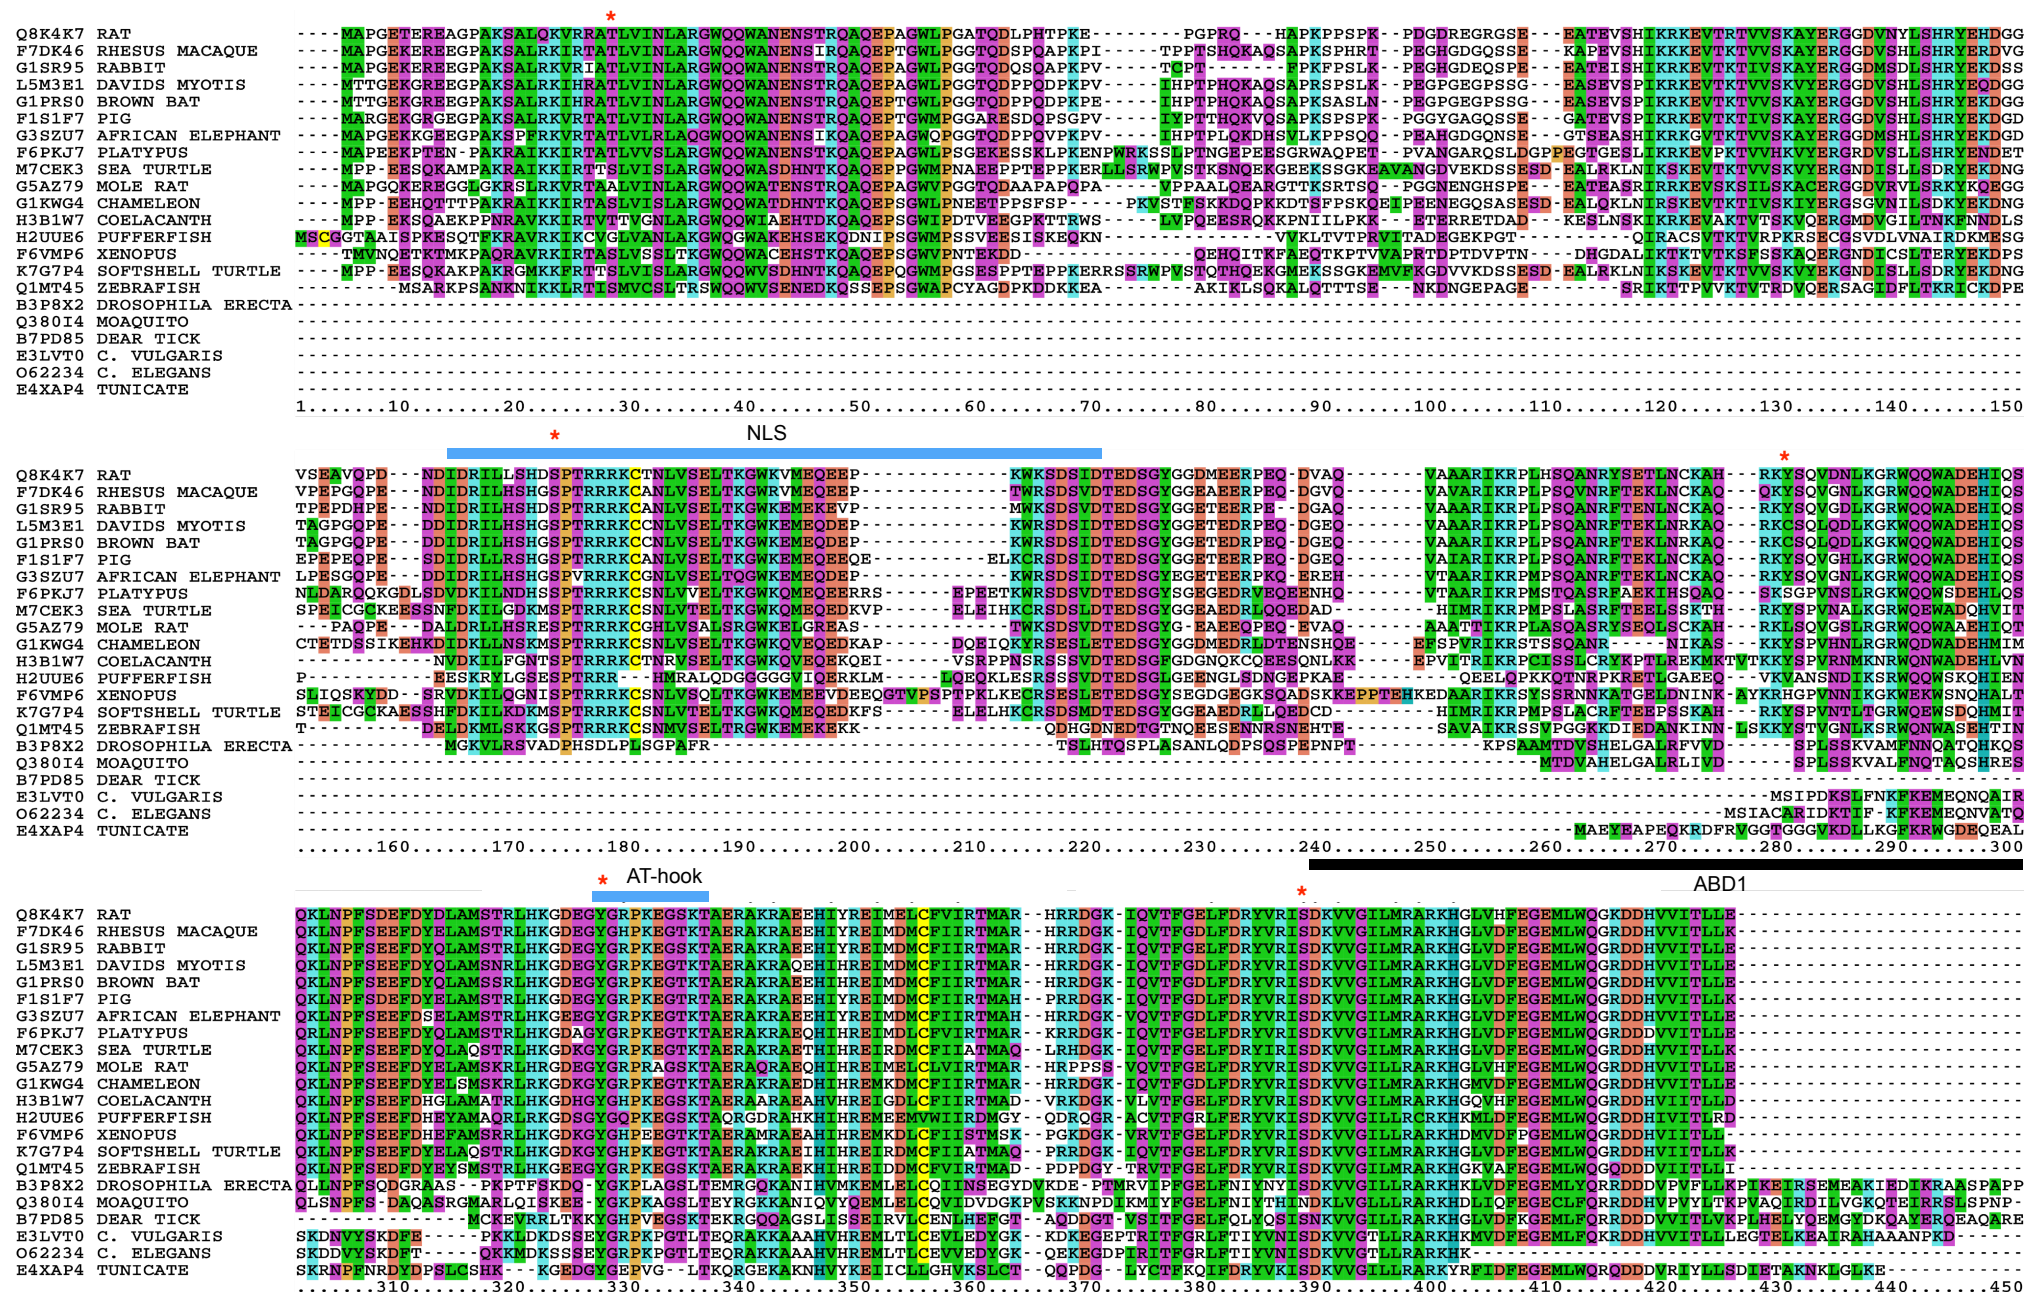

Supplement: pone.0144614.s001.pdf [file pone.0144614.s001.pdf]
