# Supplementary material for: The Cardiac Stress Response Factor Ms1 Can Bind to DNA and Has a Function in the Nucleus
Source: PubMed Central journal article supplement (PMC4682817; doi:10.1371/journal.pone.0144614), 2015-12-14
Supplement: pone.0144614.s002.pdf [file pone.0144614.s002.pdf]

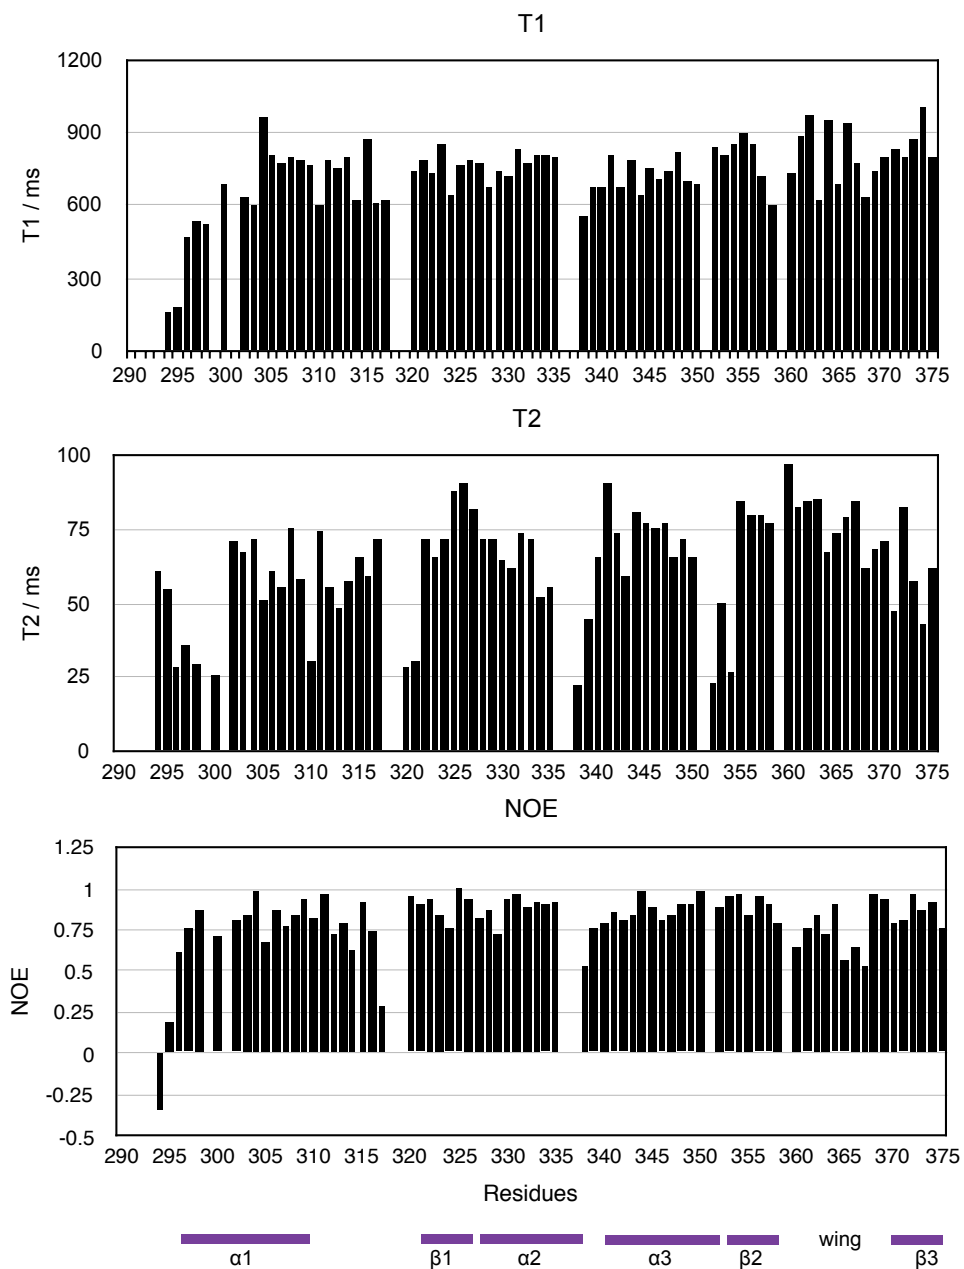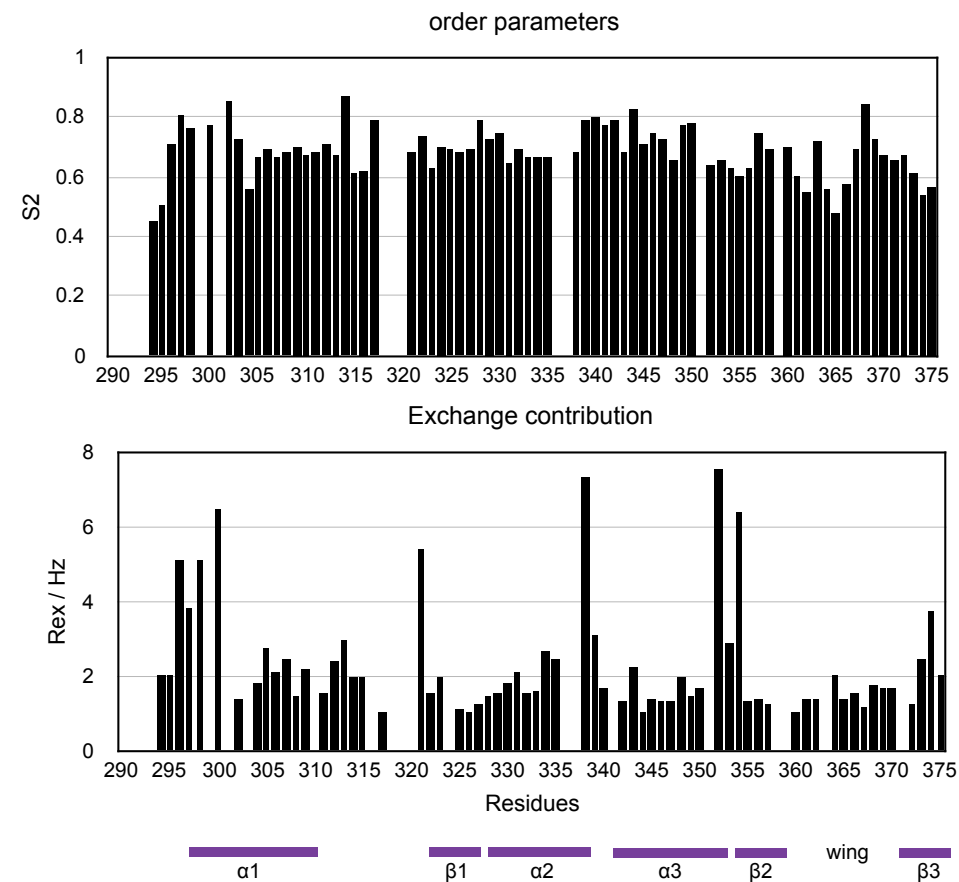

Backbone dynamics analysis of ABD2. On the left are shown the experimental values for <sup>15</sup>N T<sub>1</sub>, T<sub>2</sub> and heteronuclear NOE recorded at 500 MHz. On the right are two parameters from the Lipari-Szabo analysis, the order parameter S<sup>2</sup> and the exchange contribution R<sub>ex</sub>. Apart from a small region in the wing there is little flexibility in the compact structure.
