# Supplementary material for: The Cardiac Stress Response Factor Ms1 Can Bind to DNA and Has a Function in the Nucleus
Source: PubMed Central journal article supplement (PMC4682817; doi:10.1371/journal.pone.0144614), 2015-12-14
Supplement: pone.0144614.s003.pdf [file pone.0144614.s003.pdf]

| No: | Chain  | Z   | rmsd | lali | nres | %id | Description                                                 |
|-----|--------|-----|------|------|------|-----|-------------------------------------------------------------|
| 1:  | 1sd4-B | 5.3 | 2.8  | 59   | 122  | 8   | MOLECULE: PENICILLINASE REPRESSOR; *                        |
| 2:  | 2hr3-B | 5.1 | 4.0  | 59   | 135  | 15  | MOLECULE: PROBABLE TRANSCRIPTIONAL REGULATOR; *             |
| 3:  | 1sax-B | 5.1 | 2.8  | 59   | 120  | 10  | MOLECULE: METHICILLIN RESISTANCE REGULATORY PROTEIN MECI; * |
| 4:  | 1p6r-A | 5.1 | 2.4  | 58   | 82   | 21  | MOLECULE: PENICILLINASE REPRESSOR;                          |
| 5:  | 2d45-C | 5.0 | 3.0  | 59   | 117  | 10  | MOLECULE: METHICILLIN RESISTANCE REGULATORY PROTEIN MECI;   |
| 6:  | 1wlw-H | 5.0 | 3.4  | 60   | 70   | 10  | MOLECULE: STRUCTURAL MAINTENANCE OF CHROMOSOME 1;           |
| 7:  | 1wlw-F | 5.0 | 3.6  | 62   | 70   | 10  | MOLECULE: STRUCTURAL MAINTENANCE OF CHROMOSOME 1;           |
| 8:  | 1g3y-A | 5.0 | 3.0  | 58   | 212  | 12  | MOLECULE: DIPHTHERIA TOXIN REPRESSOR;                       |
| 9:  | 1bi2-B | 5.0 | 3.0  | 58   | 138  | 12  | MOLECULE: DIPHTHERIA TOXIN REPRESSOR;                       |
| 10: | 3bpv-A | 4.9 | 3.4  | 61   | 137  | 11  | MOLECULE: TRANSCRIPTIONAL REGULATOR;                        |
| 11: | 2qww-A | 4.9 | 3.5  | 63   | 146  | 14  | MOLECULE: TRANSCRIPTIONAL REGULATOR, MARR FAMILY;           |
| 12: | 2p7c-B | 4.9 | 3.2  | 62   | 82   | 19  | MOLECULE: STRAND 1 OF TWELVE BASE-PAIR DNA;                 |
| 13: | 2hr3-D | 4.9 | 3.7  | 61   | 140  | 15  | MOLECULE: PROBABLE TRANSCRIPTIONAL REGULATOR;               |
| 14: | 2dtr   | 4.9 | 2.9  | 57   | 137  | 12  | MOLECULE: DIPHTHERIA TOXIN REPRESSOR;                       |
| 15: | 2d45-B | 4.9 | 2.9  | 59   | 119  | 10  | MOLECULE: METHICILLIN RESISTANCE REGULATORY PROTEIN MECI;   |
| 16: | 2acj-D | 4.9 | 3.1  | 59   | 63   | 12  | MOLECULE: DOUBLE-STRANDED RNA-SPECIFIC ADENOSINE DEAMINASE; |
| 17: | 1q1h-A | 4.9 | 3.4  | 64   | 85   | 9   | MOLECULE: TRANSCRIPTION FACTOR E;                           |
| 18: | 1okr-B | 4.9 | 3.1  | 59   | 122  | 10  | MOLECULE: METHICILLIN RESISTANCE REGULATORY PROTEIN MECI;   |
| 19: | 1okr-A | 4.9 | 3.1  | 59   | 120  | 10  | MOLECULE: METHICILLIN RESISTANCE REGULATORY PROTEIN MECI;   |
| 20: | 1g3t-B | 4.9 | 3.0  | 58   | 138  | 12  | MOLECULE: DIPHTHERIA TOXIN REPRESSOR;                       |
| 21: | 1fwz-A | 4.9 | 2.8  | 57   | 211  | 12  | MOLECULE: DIPHTHERIA TOXIN REPRESSOR;                       |
| 22: | 1bi3-B | 4.9 | 2.9  | 57   | 137  | 12  | MOLECULE: DIPHTHERIA TOXIN REPRESSOR;                       |
| 23: | 2pfb-B | 4.8 | 3.2  | 57   | 123  | 21  | MOLECULE: TRANSCRIPTIONAL REGULATOR OHRR;                   |
| 24: | 2gxb-B | 4.8 | 3.0  | 58   | 63   | 12  | MOLECULE: DOUBLE-STRANDED RNA-SPECIFIC ADENOSINE DEAMINASE; |
| 25: | 1g3t-A | 4.8 | 3.0  | 57   | 215  | 12  | MOLECULE: DIPHTHERIA TOXIN REPRESSOR;                       |
| 26: | 1bi3-A | 4.8 | 2.8  | 56   | 212  | 13  | MOLECULE: DIPHTHERIA TOXIN REPRESSOR;                       |
| 27: | 3cta-A | 4.7 | 2.7  | 59   | 187  | 14  | MOLECULE: RIBOFLAVIN KINASE; *                              |
| 28: | 3c18-C | 4.7 | 2.6  | 58   | 290  | 16  | MOLECULE: NUCLEOTIDYLTRANSFERASE-LIKE PROTEIN; *            |
| 29: | 3c18-A | 4.7 | 2.6  | 58   | 290  | 16  | MOLECULE: NUCLEOTIDYLTRANSFERASE-LIKE PROTEIN;              |
| 30: | 2qqa-A | 4.7 | 2.9  | 57   | 218  | 12  | MOLECULE: DIPHTHERIA TOXIN REPRESSOR;                       |
| 31: | 2pex-B | 4.7 | 3.1  | 55   | 137  | 22  | MOLECULE: TRANSCRIPTIONAL REGULATOR OHRR;                   |
| 32: | 2gxb-A | 4.7 | 3.1  | 58   | 62   | 12  | MOLECULE: DOUBLE-STRANDED RNA-SPECIFIC ADENOSINE DEAMINASE; |
| 33: | 2fe3-B | 4.7 | 3.1  | 64   | 143  | 13  | MOLECULE: PEROXIDE OPERON REGULATOR;                        |
| 34: | 2fe3-A | 4.7 | 2.8  | 62   | 141  | 13  | MOLECULE: PEROXIDE OPERON REGULATOR;                        |
| 35: | 1xsd-A | 4.7 | 2.9  | 59   | 125  | 8   | MOLECULE: PENICILLINASE REPRESSOR;                          |
| 36: | 2qww-H | 4.6 | 3.4  | 59   | 143  | 15  | MOLECULE: TRANSCRIPTIONAL REGULATOR, MARR FAMILY;           |
| 37: | 2qww-G | 4.6 | 3.3  | 59   | 140  | 15  | MOLECULE: TRANSCRIPTIONAL REGULATOR, MARR FAMILY;           |
| 38: | 2qww-B | 4.6 | 3.6  | 61   | 144  | 15  | MOLECULE: TRANSCRIPTIONAL REGULATOR, MARR FAMILY;           |
| 39: | 2pfb-A | 4.6 | 3.0  | 57   | 129  | 23  | MOLECULE: TRANSCRIPTIONAL REGULATOR OHRR;                   |
| 40: | 2jt1-A | 4.6 | 3.3  | 60   | 71   | 13  | MOLECULE: PEFI PROTEIN;                                     |
| 41: | 2it0-D | 4.6 | 2.9  | 56   | 137  | 16  | MOLECULE: IRON-DEPENDENT REPRESSOR IDER;                    |
| 42: | 2it0-C | 4.6 | 3.1  | 58   | 137  | 17  | MOLECULE: IRON-DEPENDENT REPRESSOR IDER;                    |
| 43: | 2hzt-C | 4.6 | 4.2  | 61   | 95   | 11  | MOLECULE: PUTATIVE HTH-TYPE TRANSCRIPTIONAL REGULATOR YTCD; |
| 44: | 2hr3-A | 4.6 | 4.2  | 62   | 139  | 16  | MOLECULE: PROBABLE TRANSCRIPTIONAL REGULATOR;               |
| 45: | 2frh-A | 4.6 | 2.9  | 59   | 127  | 8   | MOLECULE: STAPHYLOCOCCAL ACCESSORY REGULATOR A;             |
| 46: | 2d45-D | 4.6 | 2.9  | 59   | 115  | 10  | MOLECULE: METHICILLIN RESISTANCE REGULATORY PROTEIN MECI;   |
| 47: | 2acj-C | 4.6 | 3.0  | 58   | 66   | 12  | MOLECULE: DOUBLE-STRANDED RNA-SPECIFIC ADENOSINE DEAMINASE; |
| 48: | 1u8r-I | 4.6 | 3.0  | 57   | 221  | 16  | MOLECULE: IRON-DEPENDENT REPRESSOR IDER;                    |
| 49: | 1u8r-H | 4.6 | 3.2  | 58   | 222  | 17  | MOLECULE: IRON-DEPENDENT REPRESSOR IDER;                    |
| 50: | 1u8r-C | 4.6 | 3.3  | 58   | 221  | 17  | MOLECULE: IRON-DEPENDENT REPRESSOR IDER;                    |

Top 50 hits of DALI search of the PDB with the structure of ABD2. Proteins that are not involved in DNA binding are marked with a blue star. Structures used in the superposition in Fig. 1D are marked with red stars.
