# Supplementary material for: The Cardiac Stress Response Factor Ms1 Can Bind to DNA and Has a Function in the Nucleus
Source: PubMed Central journal article supplement (PMC4682817; doi:10.1371/journal.pone.0144614), 2015-12-14

HeLa cells

NRCs

S5 Fig

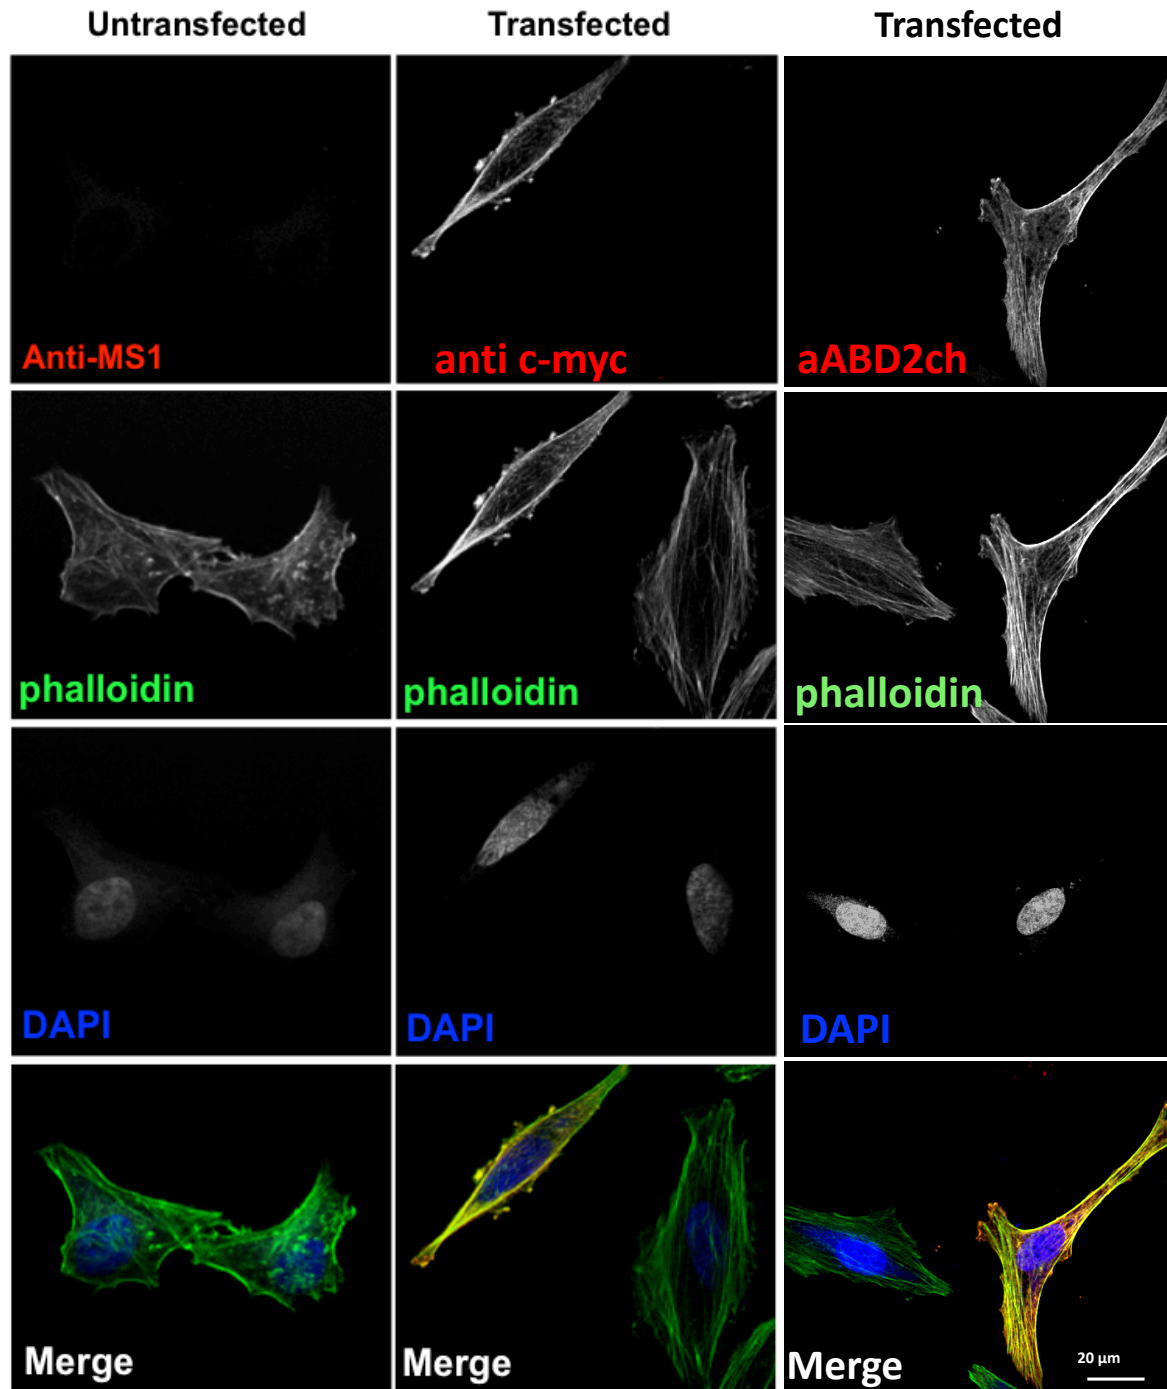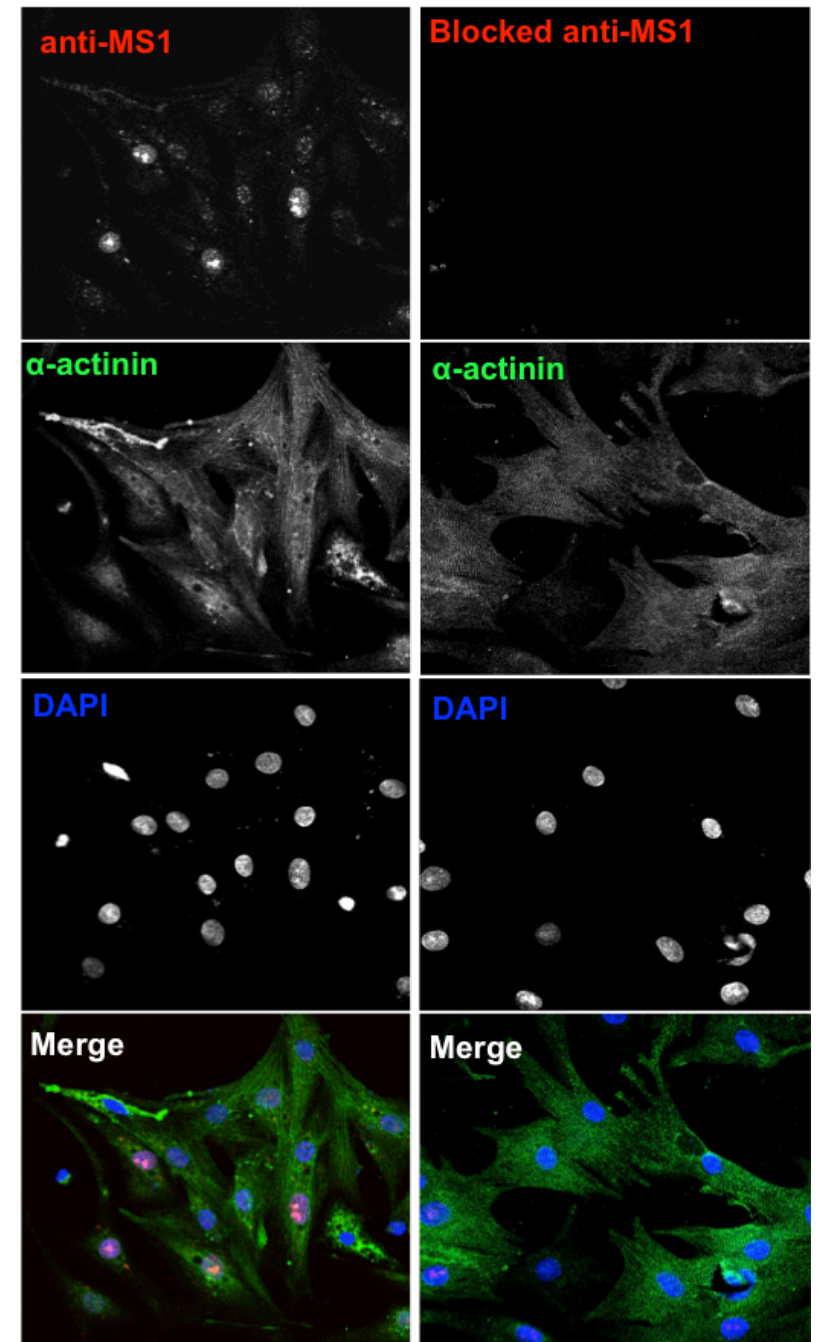

Supplement: pone.0144614.s005.pdf [file pone.0144614.s005.pdf]
