# Supplementary material for: The Cardiac Stress Response Factor Ms1 Can Bind to DNA and Has a Function in the Nucleus
Source: PubMed Central journal article supplement (PMC4682817; doi:10.1371/journal.pone.0144614), 2015-12-14
Supplement: pone.0144614.s006.pdf [file pone.0144614.s006.pdf]

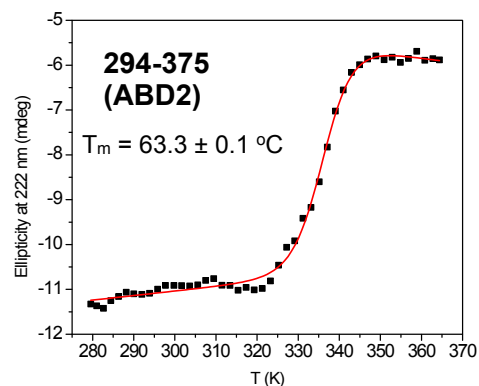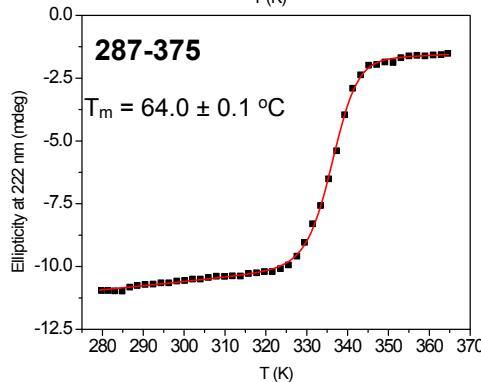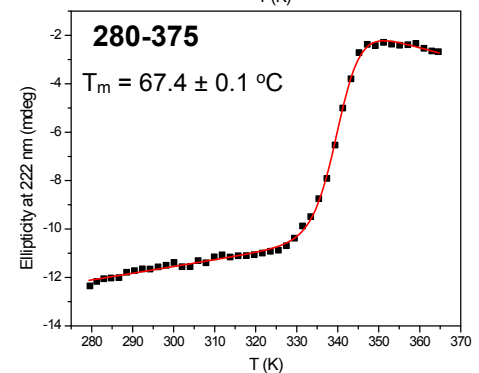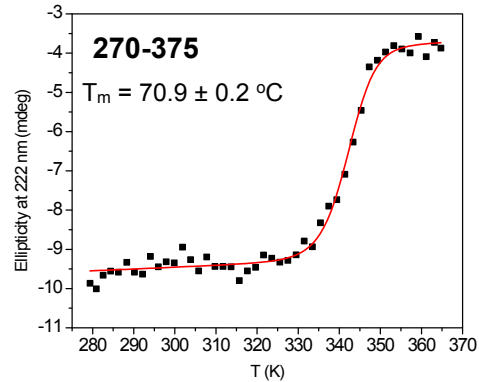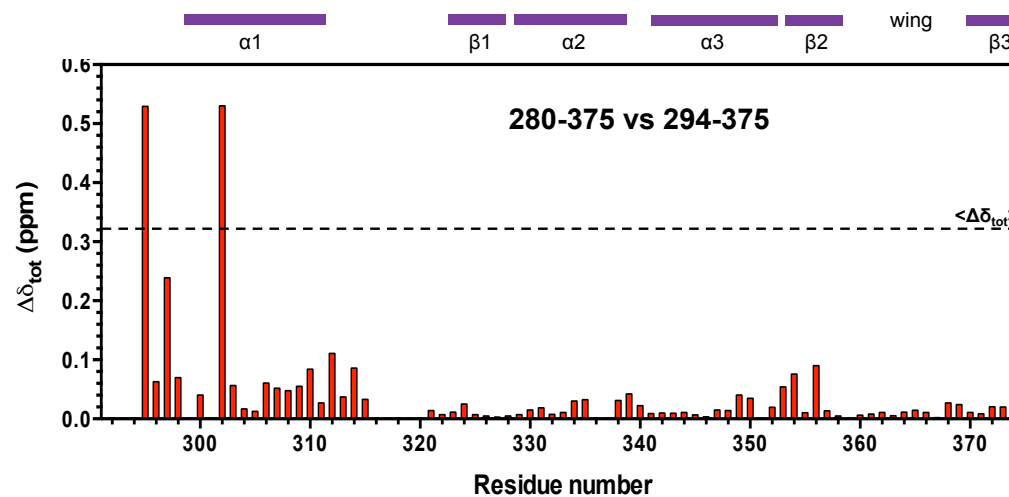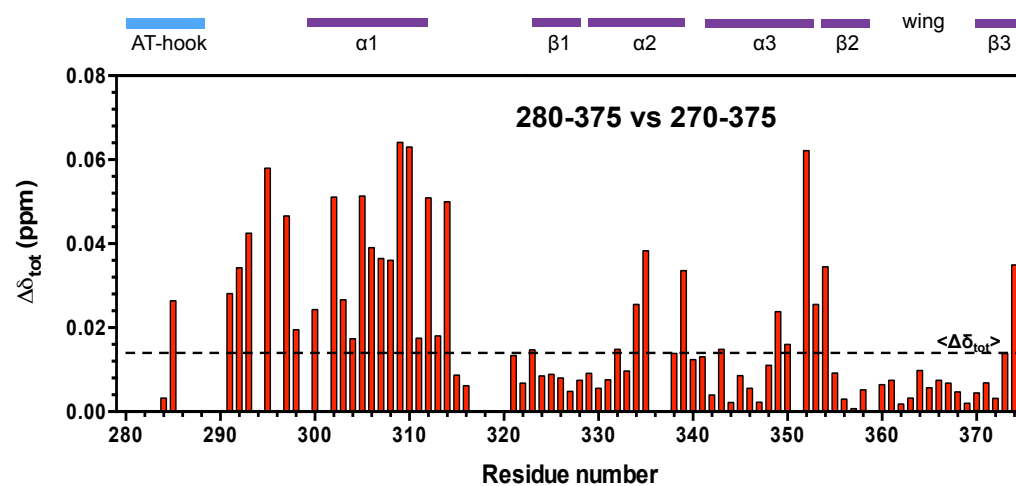

Effects of potential interactions of the N-terminal extension of ABD2 on stability and NMR spectra of ABD2. A significant increase in stability of  $> 7 \text{ } ^\circ\text{C}$  is seen for the addition of 23 amino acids at the N-terminus of ABD2. This addition leads to considerable chemical shift changes around helix one to which it would need to pack to allow the AT-hook to reach the DNA.
